# Supplementary material for: Inference of Relationships in Population Data Using Identity-by-Descent and Identity-by-State
Source: PubMed Central journal article supplement (PMC3178600; doi:10.1371/journal.pgen.1002287), 2011-09-22

A. CAU population

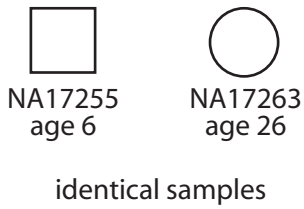

B. MEX population

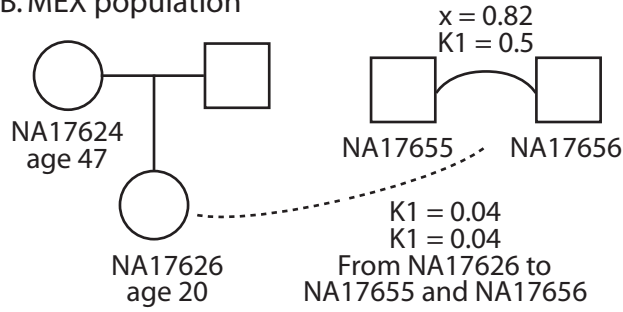

C. MEX population

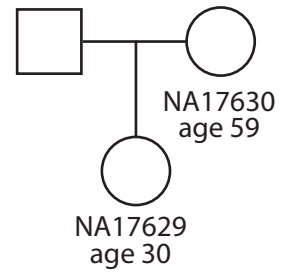

D. MEX population

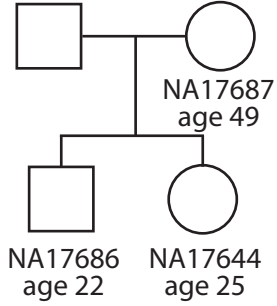

E. CHI population

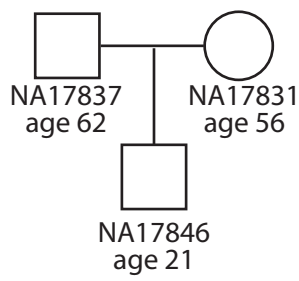

F. MEX population

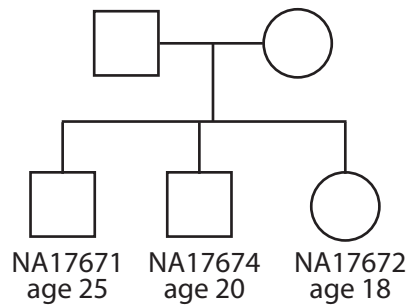

G. CAU population

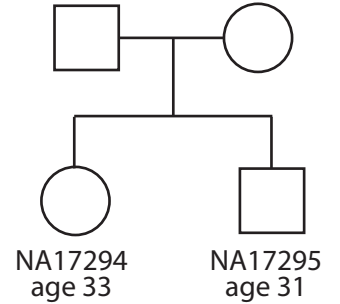

H. MEX population

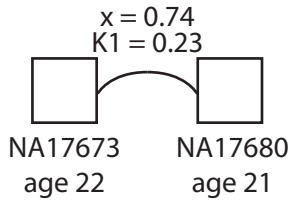

I. MEX population

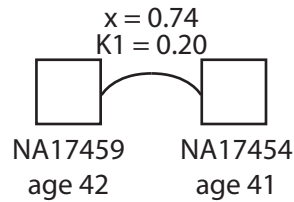

J. CAU population

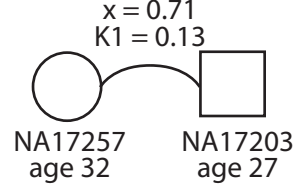

K. CAU population

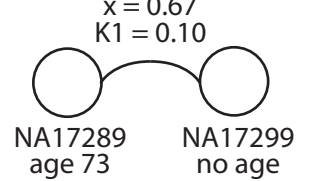

L. CHI population

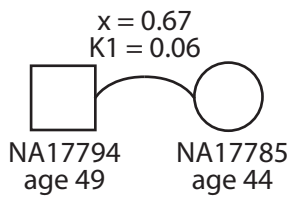

M. MEX population

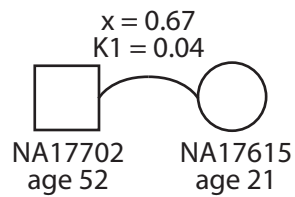

N. MEX population

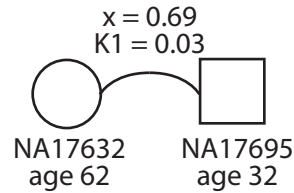

Supplement: pgen.1002287.s001.pdf [file pgen.1002287.s001.pdf]
